# Supplementary material for: Hierarchical Au/CeO2systems – influence of Ln3+dopants on the catalytic activity in the propane oxidation process
Source: Royal Society of Chemistry journal article supplement (doi:10.1039/d2ce00827k), 2022-01-01
Supplement: d2ce00827k1.pdf [file d2ce00827k1.pdf]

## Supplementary materials for

**Hierarchical Au/CeO<sub>2</sub> systems – influence of Ln<sup>3+</sup> dopants on the catalytic activity in the propane oxidation process.**

**Piotr Woźniak, Piotr Kraszkiewicz, Małgorzata A. Malecka\***

*Institute of Low Temperature and Structure Research, Polish Academy of Sciences,*

*P.O. Box 1410, 50-950 Wrocław 2, Poland*

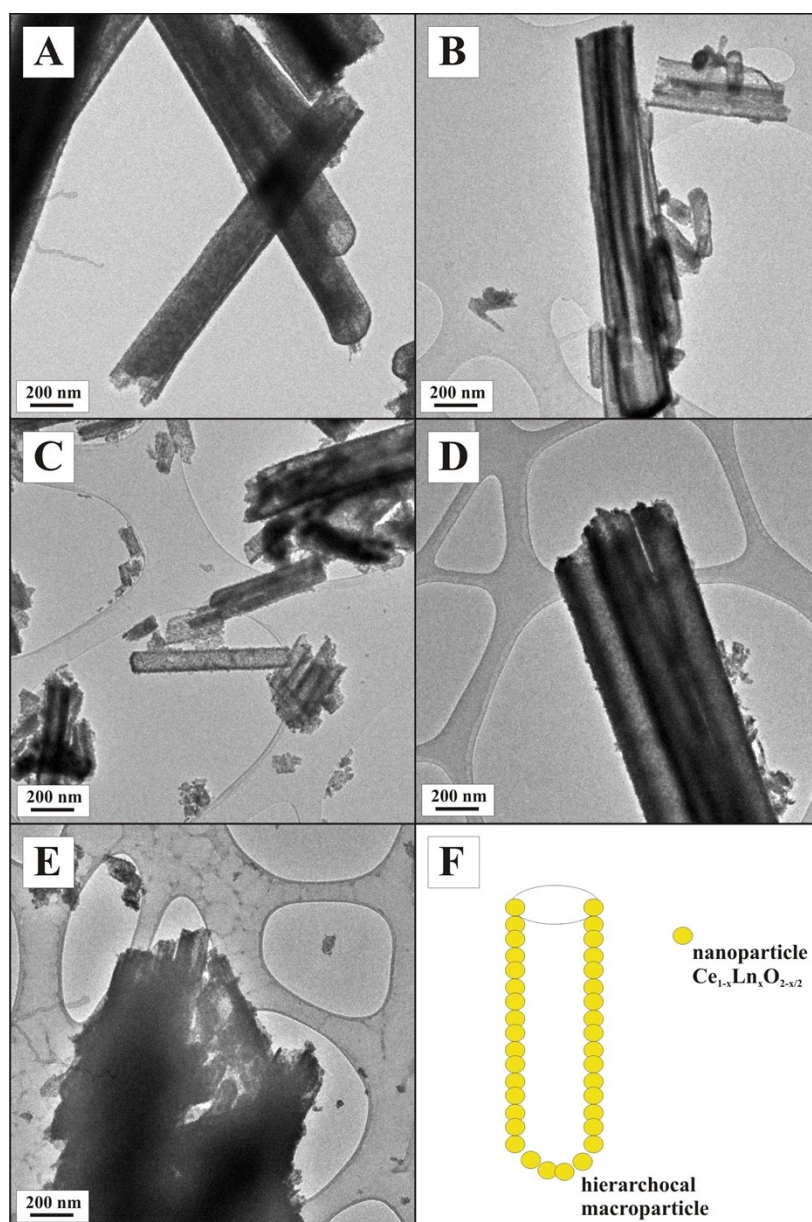

Fig.S1 TEM images of hierarchical tube-like (A) CeO<sub>2</sub>, (B) Ce<sub>0.9</sub>La<sub>0.1</sub>O<sub>1.95</sub>, (C) Ce<sub>0.9</sub>La<sub>0.05</sub>Yb<sub>0.05</sub>O<sub>1.95</sub>, (D) Ce<sub>0.9</sub>Gd<sub>0.1</sub>O<sub>1.95</sub>, (E) Ce<sub>0.9</sub>Yb<sub>0.1</sub>O<sub>1.95</sub>, (F) model of the hierarchocal tube-like macroparticle.

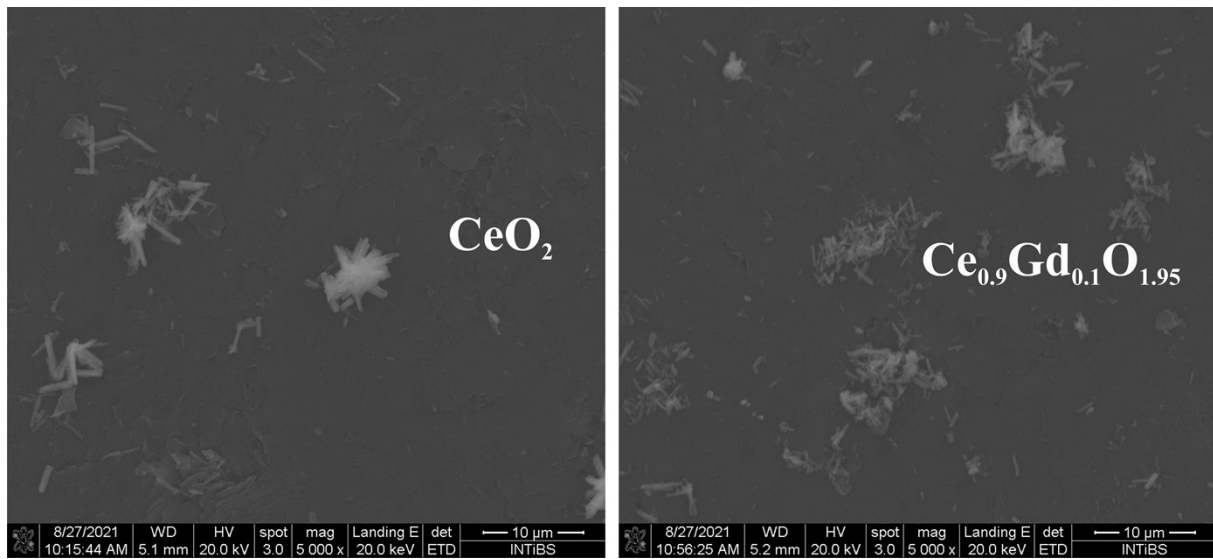

Fig.S2 SEM images of hierarchical tube-like  $\text{CeO}_2$  and  $\text{Ce}_{0.9}\text{Gd}_{0.1}\text{O}_{1.95}$

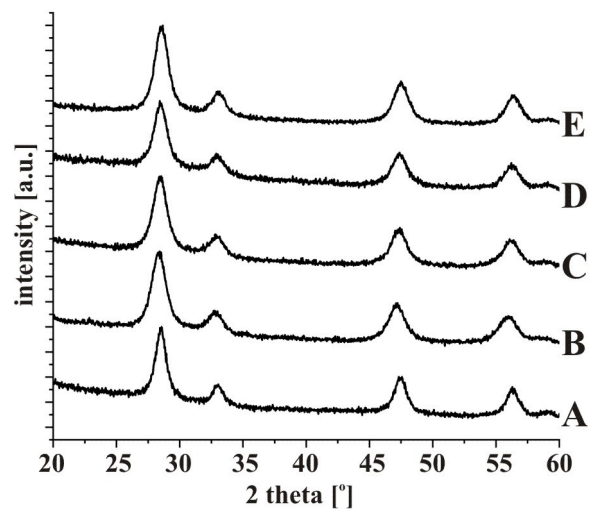

Fig.S3 XRD patterns of (A)  $\text{CeO}_2$ , (B)  $\text{Ce}_{0.9}\text{La}_{0.1}\text{O}_{1.95}$ , (C)  $\text{Ce}_{0.9}\text{La}_{0.05}\text{Yb}_{0.05}\text{O}_{1.95}$ , (D)  $\text{Ce}_{0.9}\text{Gd}_{0.1}\text{O}_{1.95}$ , (E)  $\text{Ce}_{0.9}\text{Yb}_{0.1}\text{O}_{1.95}$ .

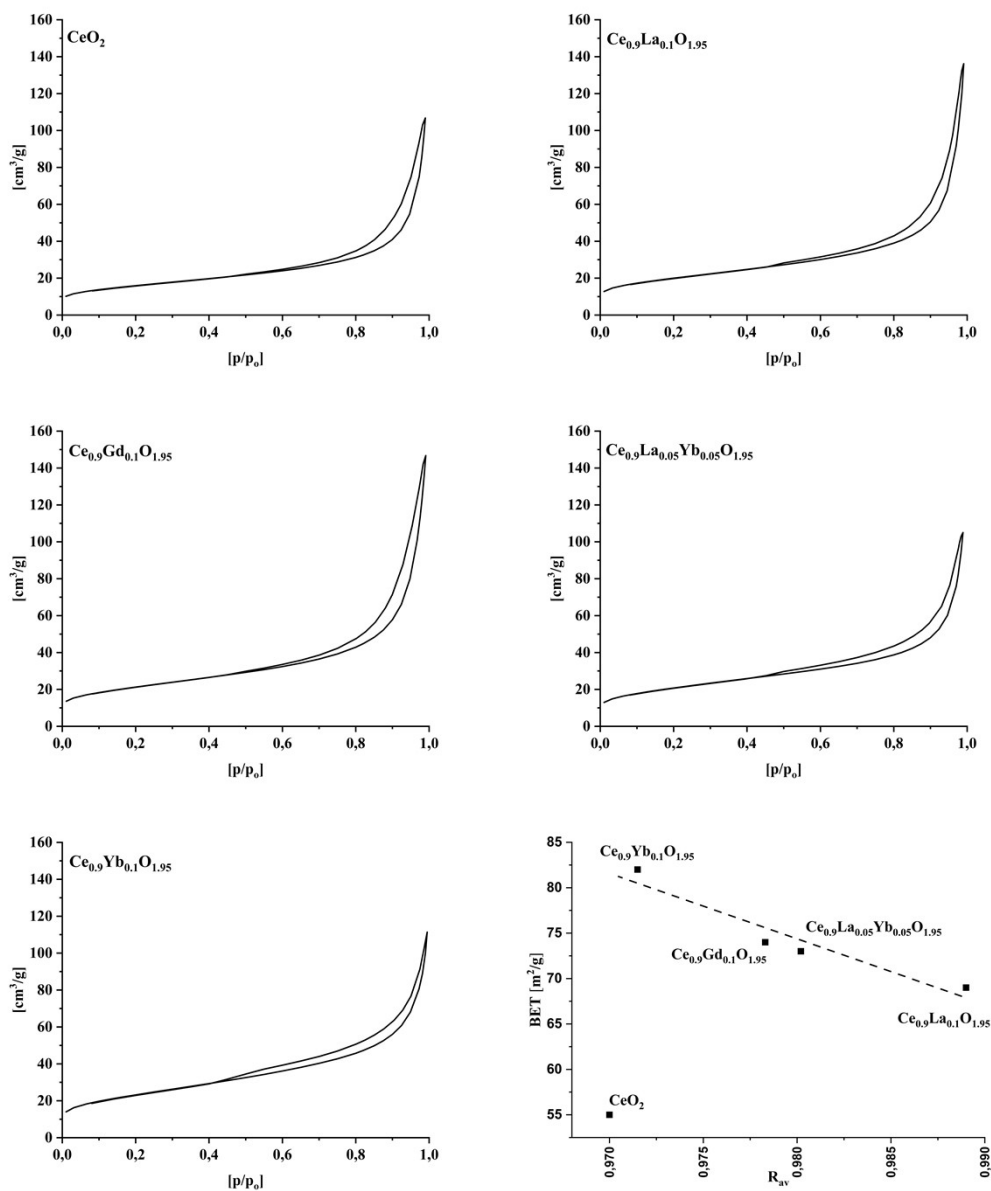

Fig.S4 Nitrogen adsorption–desorption isotherm of investigated hierarchical supports and a linear relationship between the mean lanthanide ion radius and the  $S_{\text{BET}}$  surface area for our sample series.

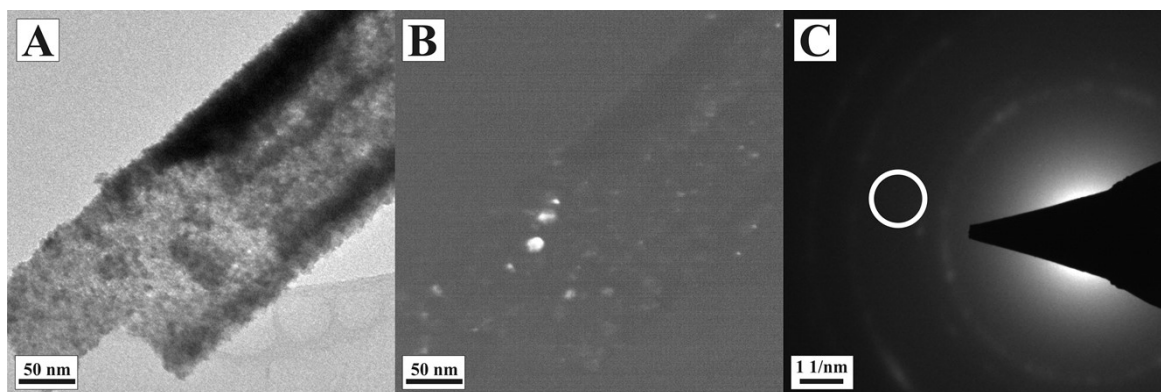

Fig.S5 (A) TEM-BF and (B) TEM-DF images of hierarchical tube-like CeO<sub>2</sub> and (C) SAED pattern with position of the aperture (between the rings CeO<sub>2</sub>200 and CeO<sub>2</sub>220).

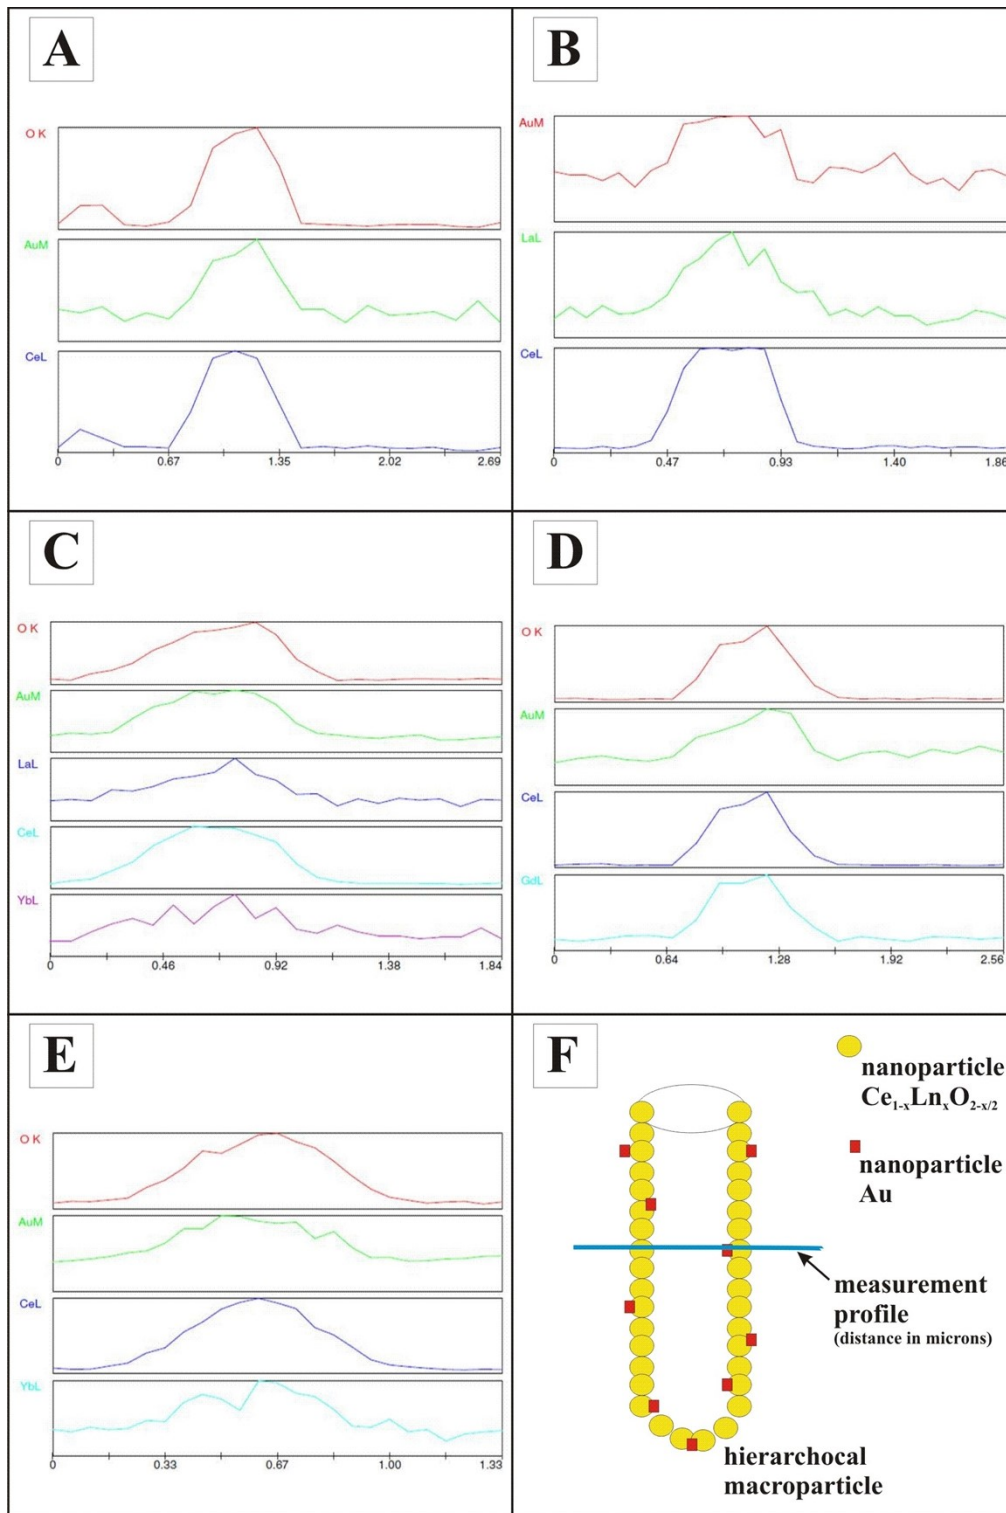

Fig.S6 Line profile of SEM-EDX of hierarchical tube-like (A) Au/CeO<sub>2</sub>, (B) Au/Ce<sub>0.9</sub>La<sub>0.1</sub>O<sub>1.95</sub>, (C) Au/Ce<sub>0.9</sub>La<sub>0.05</sub>Yb<sub>0.05</sub>O<sub>1.95</sub>, (D) Au/Ce<sub>0.9</sub>Gd<sub>0.1</sub>O<sub>1.95</sub>, (E) Au/Ce<sub>0.9</sub>Yb<sub>0.1</sub>O<sub>1.95</sub>, (F) model of measurement.
